# Supplementary material for: An aggregation-induced emission luminogen combined with a cyanoacrylate fuming method for latent fingerprint analysis
Source: Royal Society of Chemistry journal article supplement (doi:10.1039/c9an02158b), 2020-01-01
Supplement: c9an02158b1.pdf [file c9an02158b1.pdf]

## Supporting Information

for

### **An aggregation-induced emission luminogen combined with a cyanoacrylate fuming method for latent fingerprint analysis**

Xiaodong Jin<sup>\*a</sup>, Hao Wang<sup>a</sup>, Ran Xin<sup>b</sup>, Yining Ma<sup>a</sup>, Guoping Wu<sup>a</sup>, Tongxiang Xu<sup>a</sup>,  
Xiaowei Xia<sup>a</sup>, Shifan Wang<sup>\*c</sup>, Rongliang Ma<sup>\*d</sup>

*a. Department of Criminal Science and Technology & Jiangsu Engineering Laboratory of Food, Drug, and Environment Criminal Investigation and Forensic Analysis, Jiangsu Police Institute, Nanjing, Jiangsu, 210031, P. R. China.*

*b. Center of Forensic Science and Technology, Bureau of Public Security for Jiangsu province, Nanjing, Jiangsu, 210024, P. R. China.*

*c. School of Chemistry and Chemical Engineering, Xuzhou University of Technology, Xuzhou 221111, P. R. China*

*d. Institute of Forensic Science, Ministry of Public Security, Beijing 100038, P. R. China*

Corresponding authors:

E-mail: [jinxiaodong@jspi.edu.cn](mailto:jinxiaodong@jspi.edu.cn) (Dr. X. Jin) or [kingxd@yeah.net](mailto:kingxd@yeah.net) (Dr. X. Jin),  
[shifanwang@xzit.edu.cn](mailto:shifanwang@xzit.edu.cn) (Dr. S. Wang), and [marl2013@163.com](mailto:marl2013@163.com) (Dr. R. Ma)

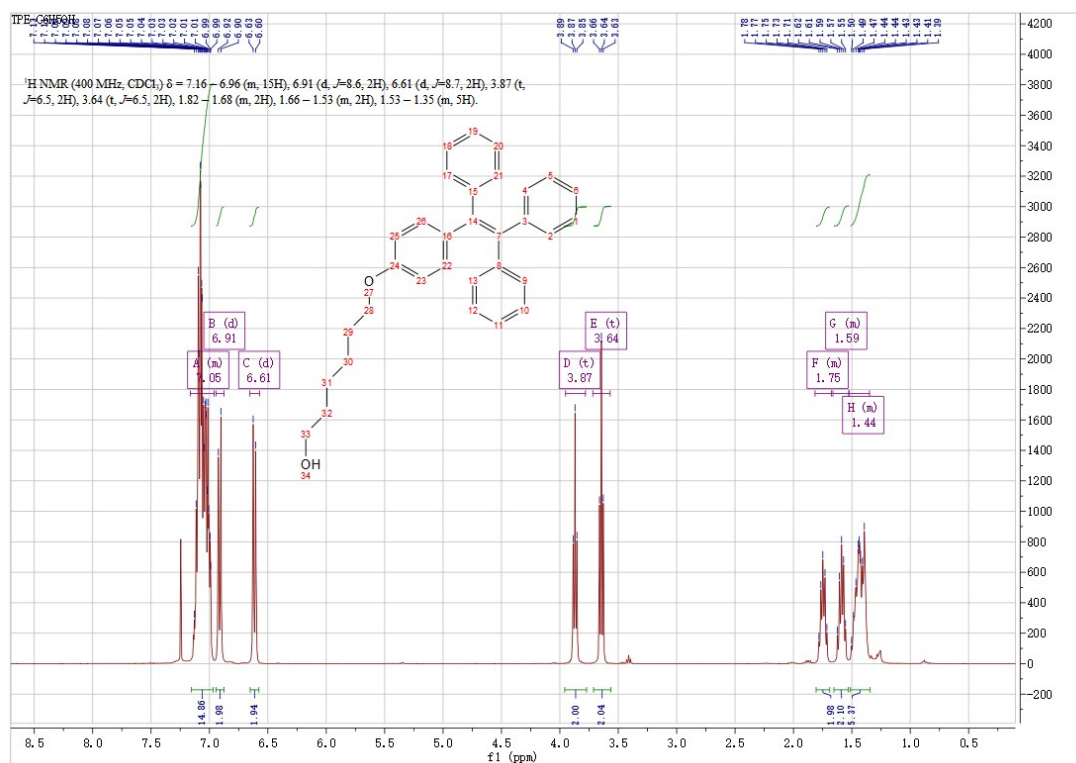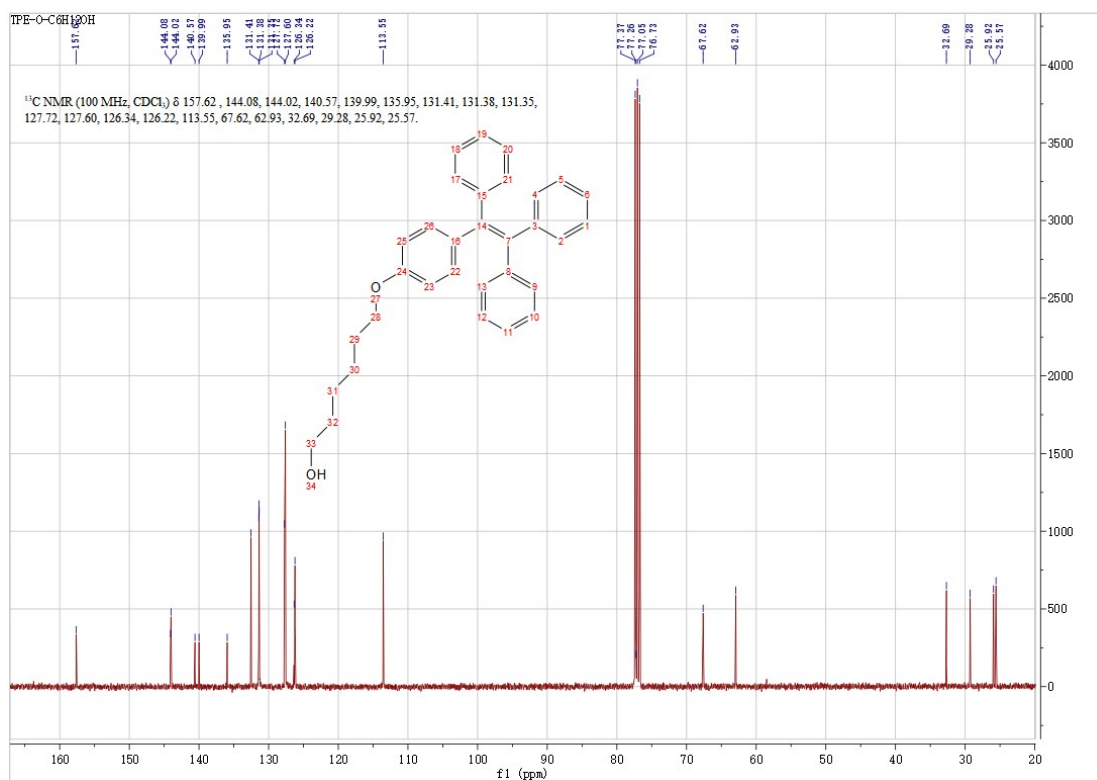

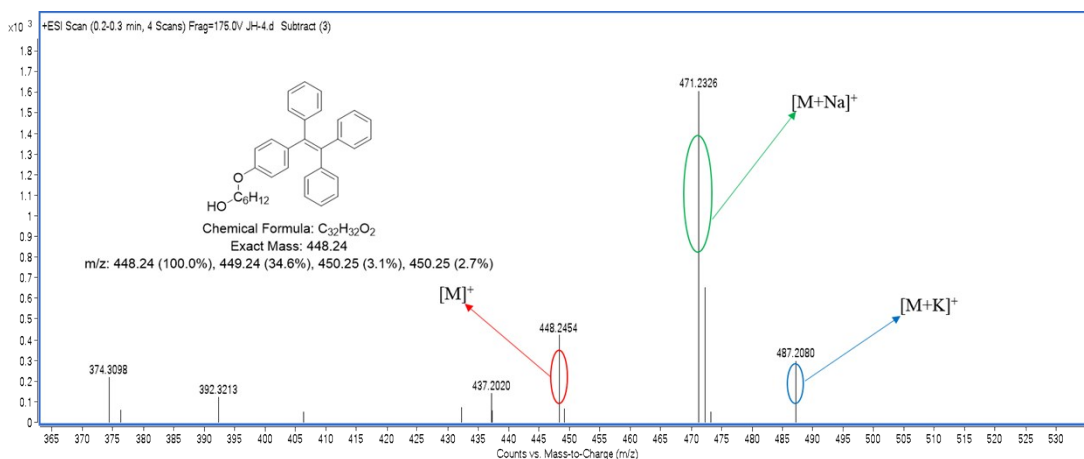

Fig. S3 Mass spectrum of FLA-2.

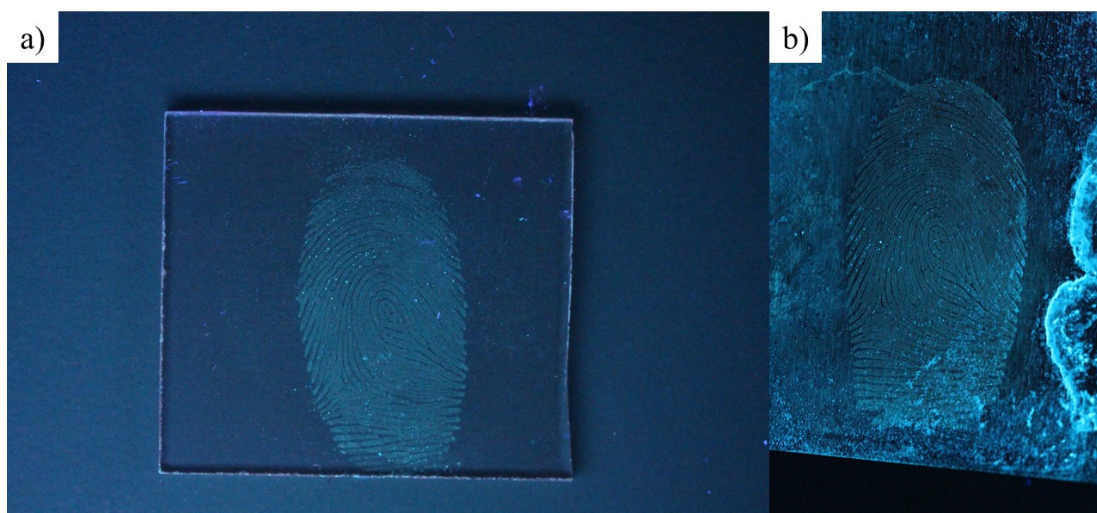

Fig. S4 Original fluorescence images of sebaceous fingerprints on a) glass slide, and b) aluminum foil developed by AIE of FLA-2 aggregates.

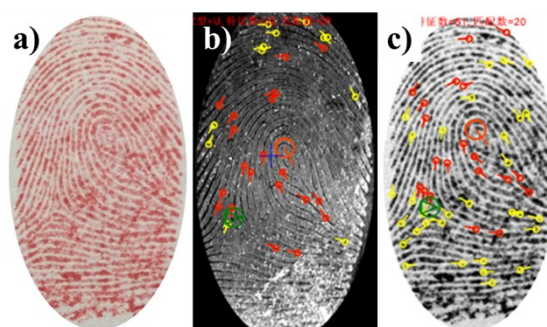

Fig. S5 a) Standard ink fingerprint taken as reference; Automated Fingerprint Identification System (AFIS) analysis for fingerprint images developed by using the dye FLA-2 on an aluminum foil substrates b) and validated by the corresponding matches obtained from a database of the ink fingerprint c). Note: the yellow  $\circ$  and red  $\circ$  represent the minutia points of the fingerprint; the red  $\circ$  also represents the corresponding points observed in both the standard ink fingerprint and the fingerprint developed using the dye FLA-2.

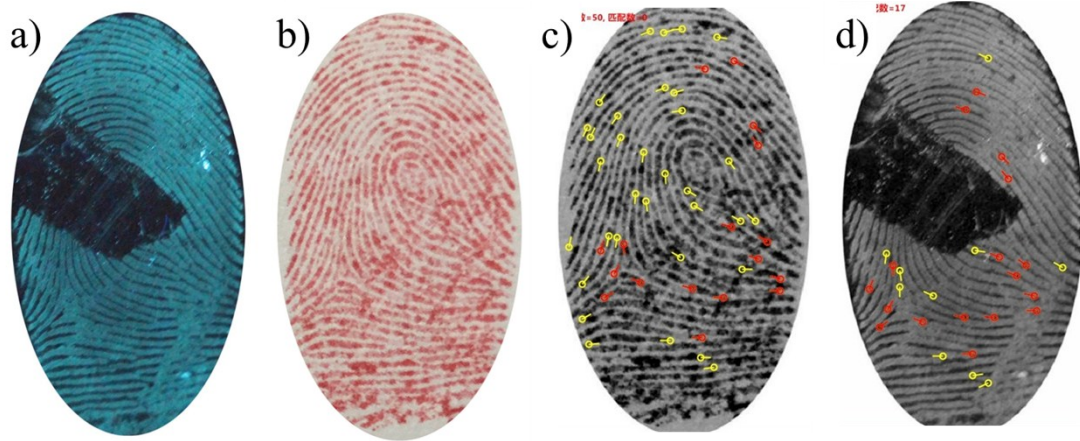

Fig. S6 a) The LFPs visualized by the dye **FLA-2**, irradiated by a hand-held UV lamp onto the surface of glass slide; b) standard ink fingerprint taken as a reference; c) ink fingerprint for analysis of correspondences; d) AFIS analysis for fingerprints images developed by using dye **FLA-2** on a glass slide surface with the ink fingerprint. Note: the yellow  $\bigcirc$  and red  $\bigcirc$  represent the minutia points of the fingerprint; the red  $\bigcirc$  also represents the corresponding points observed in both the standard ink fingerprint and the fingerprint developed using the dye **FLA-2**.

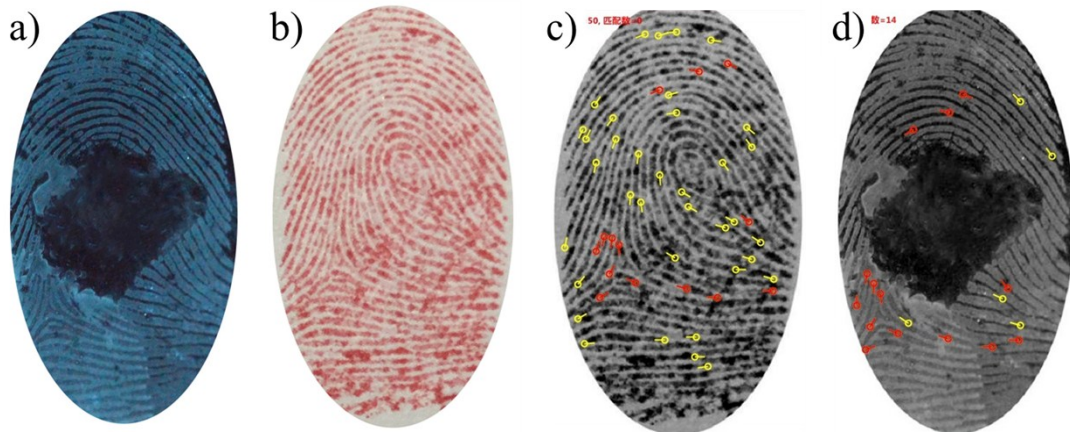

Fig. S7 a) The LFPs visualized by the dye **FLA-2**, irradiated by a hand-held UV lamp onto the surface of glass slide; b) standard ink fingerprint taken as a reference; c) ink fingerprint for analysis of correspondences; d) AFIS analysis for fingerprints images developed by using dye **FLA-2** on a glass slide surface with the ink fingerprint. Note: the yellow  $\bigcirc$  and red  $\bigcirc$  represent the minutia points of the fingerprint; the red  $\bigcirc$  also represents the corresponding points observed in both the standard ink fingerprint and the fingerprint developed using the dye **FLA-2**.

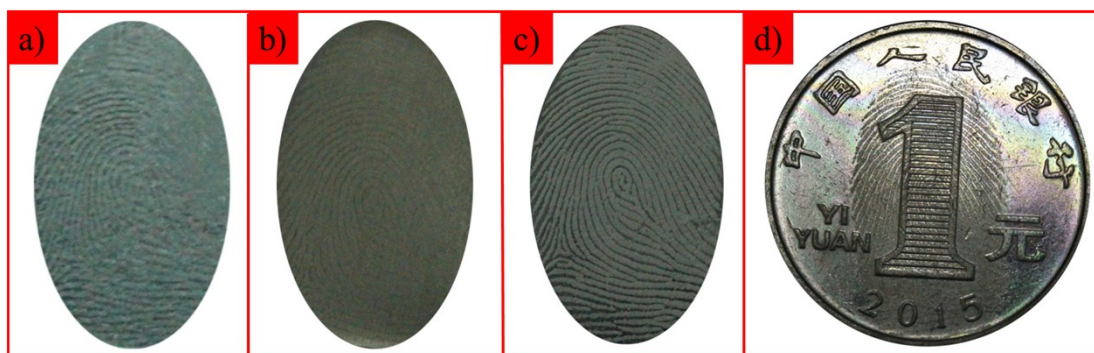

Fig. S8 The images (a-d) of fingerprints pretreated with the cyanoacrylate fuming method on the a) glass slide, b) stainless steel sheet, c) aluminum foil, d) coin substrates under daylight.

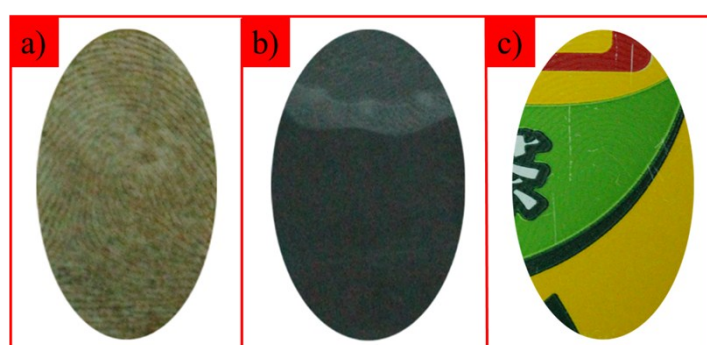

Fig. S9 The images (a-c) of fingerprints pretreated with the cyanoacrylate fuming method on the a) marble, b) soft drink label, and c) pop-top can substrates under daylight.

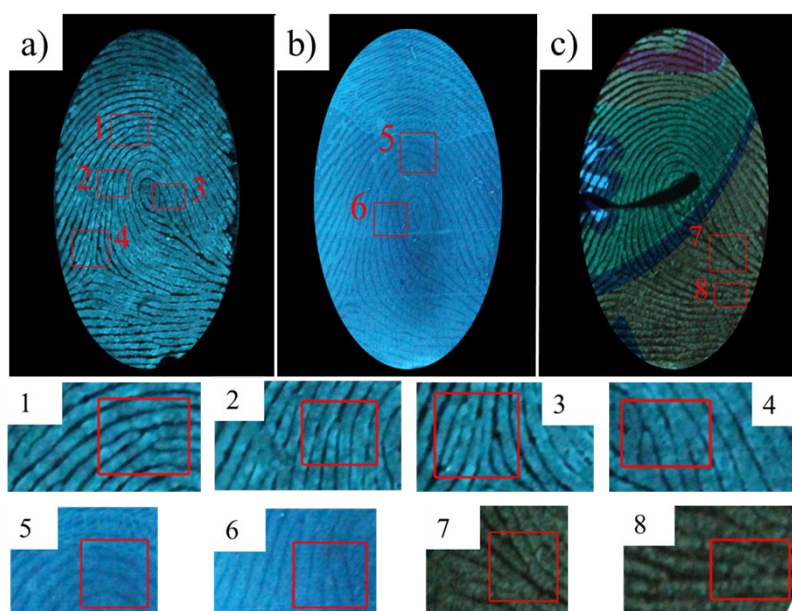

Fig. S10 The fluorescent images (a-c) of fingerprints pretreated with the cyanoacrylate fuming method and incubating with the dye **FLA-2** solution on: a) marble, b) soft drink label, and c) pop-top can, and the corresponding fluorescent images of the enlarged level-2 fingerprint details (1-8).

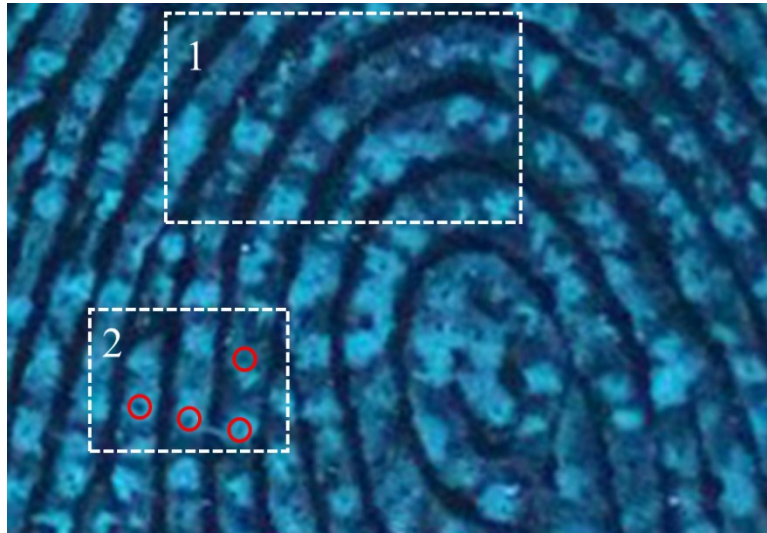

Fig. S11 The level-3 fingerprint fluorescent image and the enlarged fine structure of ridges in (1) and sweat pores in (2). (the red ○)

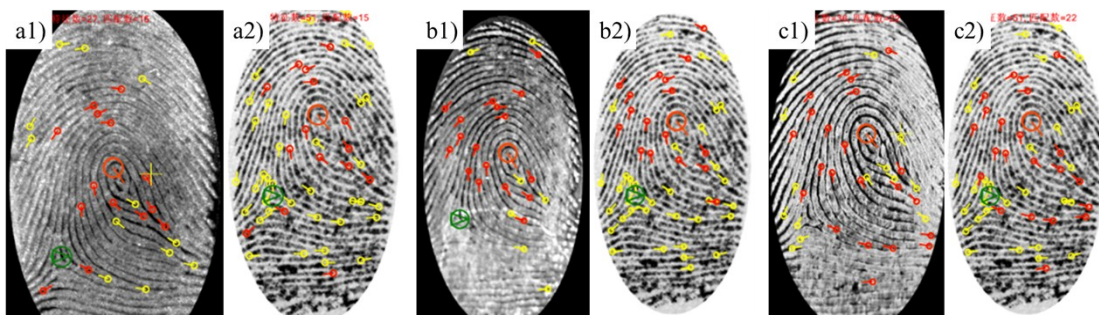

Fig. S12 AFIS analysis of old fingerprint images: a1) 7d, b1) 16 d, c1) 30 d developed by using the dye **FLA-2** on an aluminum foil substrate and validated by the corresponding matches obtained from a database of the ink fingerprint a2 - c2). Note: the yellow ○ and red ○ represent the minutia points of the fingerprint; the red ○ also represents the corresponding points observed in both the standard ink fingerprint and the fingerprints developed using the dye **FLA-2**.

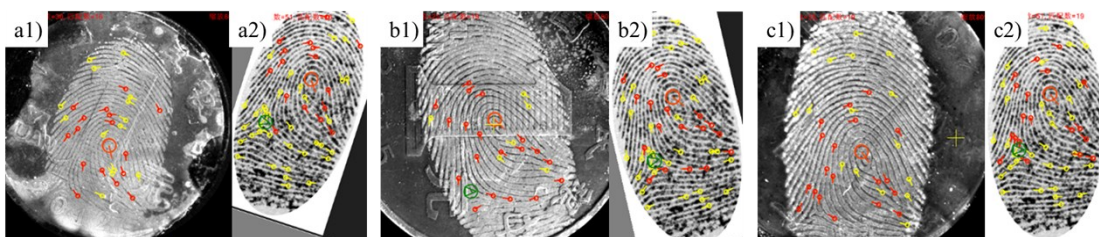

Fig. S13 AFIS analysis of old fingerprint images: a1) 7d, b1) 16 d, c1) 30 d developed by using the dye **FLA-2** on a coin surface and validated by the corresponding matches obtained from a database of the ink fingerprint a2 - c2). Note: the yellow ○ and red ○ represent the minutia points of the fingerprint; the red ○ also represents the corresponding points observed in both the standard ink fingerprint and the fingerprints developed using the dye **FLA-2**.
